# Supplementary material for: Abscisic Acid: A Potential Secreted Effector Synthesized by Phytophagous Insects for Host-Plant Manipulation
Source: MDPI journal article supplement (doi:10.3390/insects14060489), 2023-05-24
Supplement: s1 [file s1]

| Order (Family)                                          | Gall Inducer                                                                                    | Non-gall Inducer                                          | Life Stage                                           | Host Plant                                                                                                 | Locality                                                               | Site-Collector                                            |
|---------------------------------------------------------|-------------------------------------------------------------------------------------------------|-----------------------------------------------------------|------------------------------------------------------|------------------------------------------------------------------------------------------------------------|------------------------------------------------------------------------|-----------------------------------------------------------|
| <b>Thysanoptera</b><br>(Phlaeothripidae)<br>(Thripidae) | <i>Klambothrips myopori</i>                                                                     | <i>Frankliniella occidentalis</i>                         | Adult<br>Adult                                       | <i>Myoporum laetum</i><br><i>Rosa sp.</i>                                                                  | Pacifica, CA<br>Half Moon Bay, CA                                      | Field-EFC<br>Greenhouse-EFC                               |
| <b>Hemiptera</b><br>(Aphididae)                         | <i>Tamalia coweni</i>                                                                           | <i>Tamalia inquilinus</i><br><i>Myzus persicae</i>        | Adult<br>Adult + Nymph<br>Adult + Nymph              | <i>Arctostaphylos viscida</i><br><i>Arctostaphylos viscida</i><br><i>Salix lasiolepis</i>                  | Chico, CA<br>Chico, CA<br>San Francisco, CA                            | Field-DGM & EFC<br>Field-EFC<br>Field-EFC                 |
| <b>Coleoptera</b><br>(Curculionidae)                    | <i>Rhinusa pilosa</i>                                                                           | <i>Mecinus janthinis</i><br><i>Mecinus janthiniformis</i> | Adult & Larvae<br>Adult & Larvae<br>Adult & Larvae   | <i>Linaria vulgaris</i><br><i>Linaria vulgaris</i><br><i>Linaria dalmatica</i>                             | Lethbridge, CAN<br>Lethbridge, CAN<br>Fort Macleod, CAN                | Lab Colonies-RDF<br>Lab & Field colonies-RDF<br>Field-RDF |
| <b>Hymenoptera</b><br>(Tenthredinoidea)                 | <i>Pontania pacifica</i>                                                                        | <i>Cimbex americana</i><br><i>Nematus iridescens</i>      | Larvae<br>Larvae<br>Larvae                           | <i>Salix lasiolepis</i><br><i>Salix lasiolepis</i><br><i>Populus angustifolia</i> X<br><i>P. fremontii</i> | Pacifica, CA<br>Pacifica, CA<br>Flagstaff, AZ                          | Field-EFC<br>Field-EFC<br>Field-PWP                       |
| <b>Lepidoptera</b><br>(Gelechiidae)                     | <i>Gnorimoschema gallaesolidaginis</i>                                                          | <i>Dichomeris sp.</i>                                     | Larvae<br><br>Larvae                                 | <i>Solidago altissima</i><br><br><i>Solidago altissima</i>                                                 | University Park, PA<br><br>University Park, PA                         | Field-JFT<br><br>Field-JFT                                |
| <b>Diptera</b><br>(Tephritidae)<br><br>(Cecidomyiidae)  | <i>Eurosta solidaginis</i><br><br><i>Mayetiola destructor</i><br><i>Rhopalomyia californica</i> | <i>Bactrocera oleae</i>                                   | Adult & Larvae<br>Adult & Larvae<br>Larvae<br>Larvae | <i>Solidago altissima</i><br><i>Olea europea</i><br><i>Triticum aestivum</i><br><i>Baccharis pilularis</i> | Northfield, MN<br>Santa Rosa, CA<br>Manhattan, KS<br>San Francisco, CA | Field-EFC<br>Field-EFC<br>Greenhouse-MS<br>Field-EFC      |

**Supplemental Table S1. Tissue sampling for HPLC-MS/MS analysis of ABA.**

In cases where two life stages were collected: & indicates both stages were analyzed separately, + indicates stages were pooled. Collectors are indicated by abbreviated names: Rosemarie De Clerck-Floate (RDF), Edward F. Connor (EFC), Ming-Shun Chen (MSC), John F. Tooker (JFT), Peter W. Price (PWP), Donald G. Miller (DGM)
