# Supplementary material for: Abscisic Acid: A Potential Secreted Effector Synthesized by Phytophagous Insects for Host-Plant Manipulation
Source: MDPI journal article supplement (doi:10.3390/insects14060489), 2023-05-24

# Controls: No antibody with DAPI staining

Green-488nm laser (493-634 nm emission) & Blue-405 nm laser (410-497nm emission)

Salivary Gland

Gut

Musculature

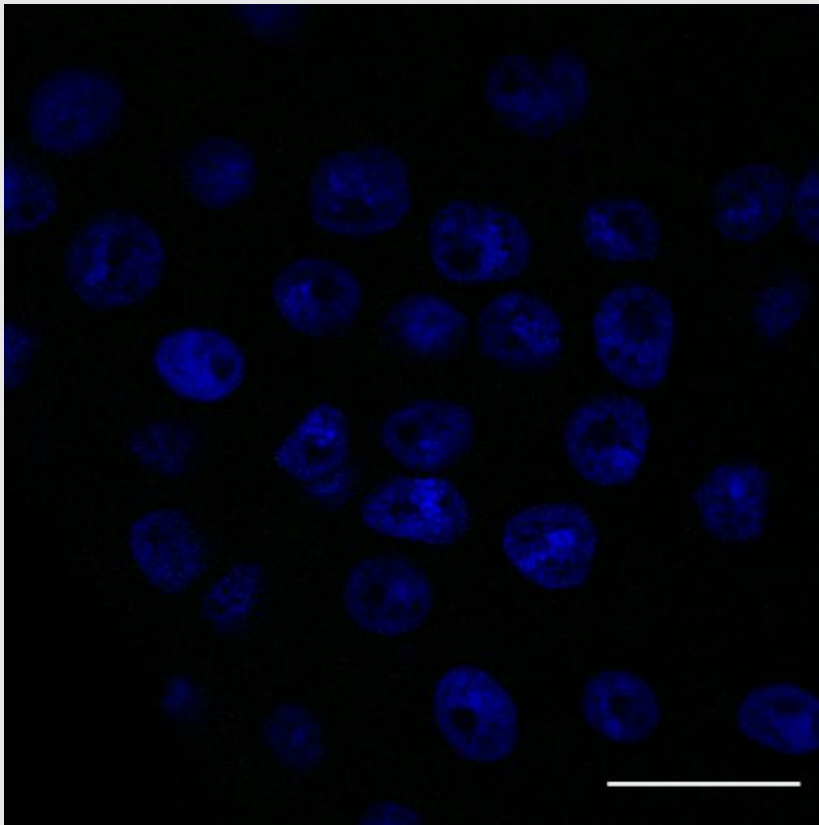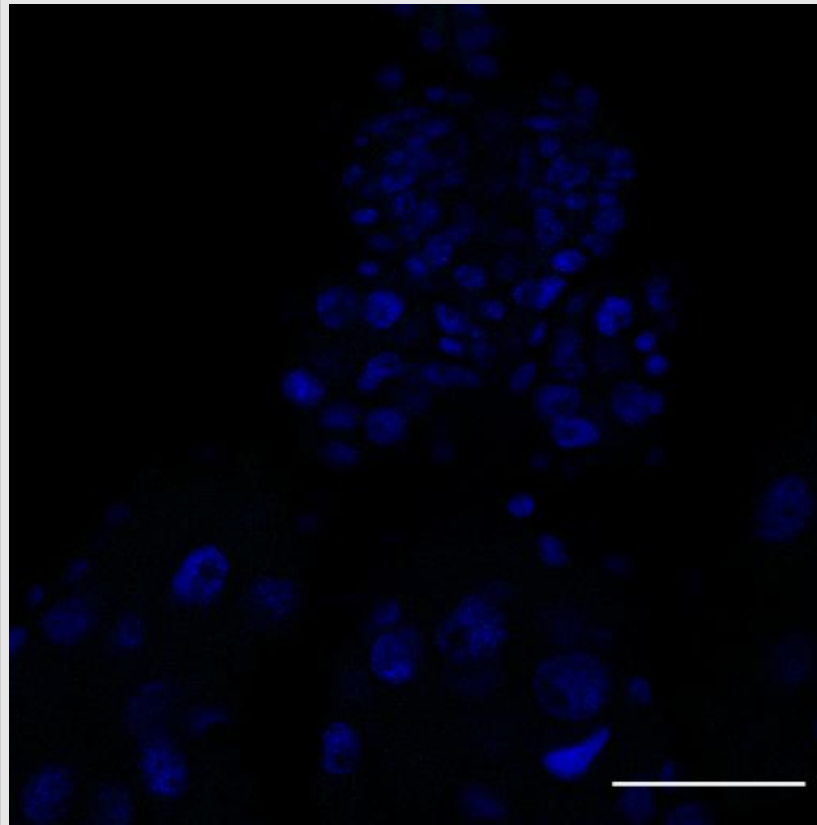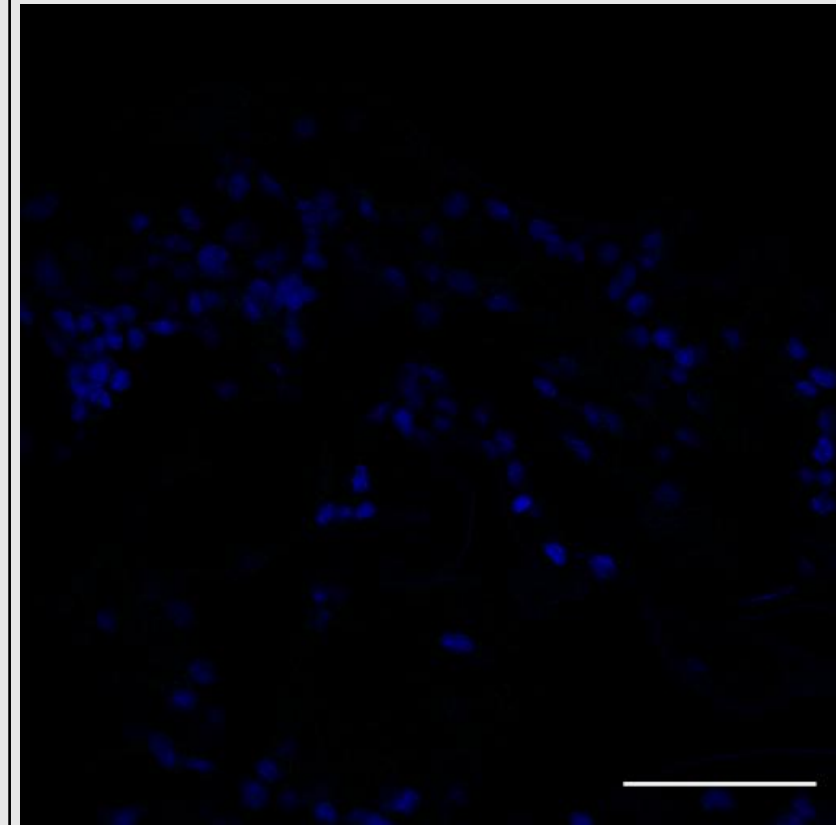

# Controls: Primary antibody only with DAPI

Green-488nm laser (493-634 nm emission) & Blue-405 nm laser (410-497nm emission)

Salivary Gland

Gut

Musculature

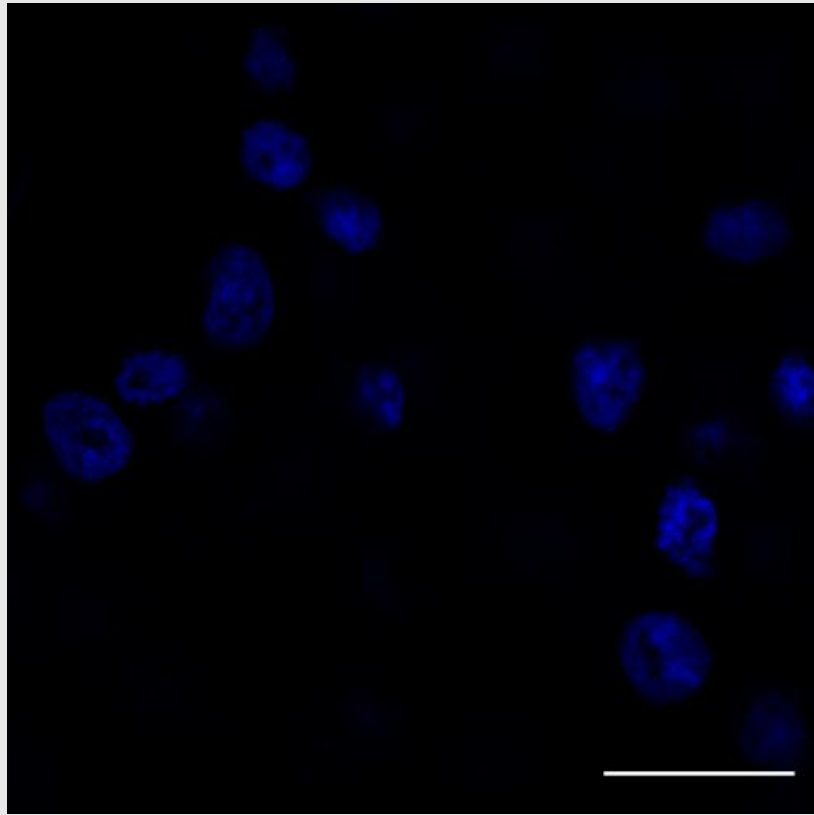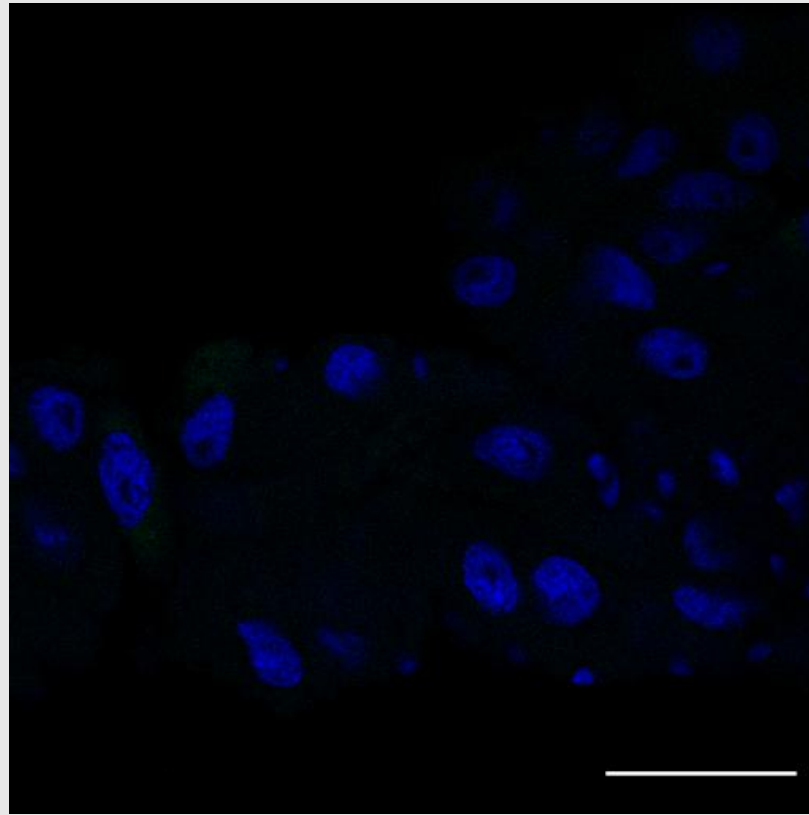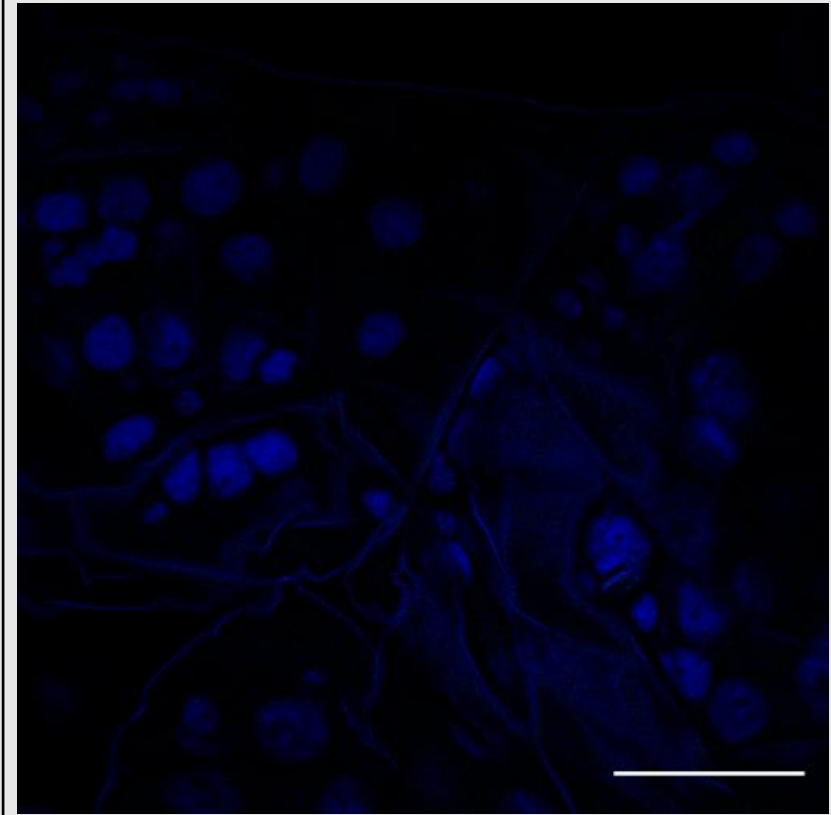

# Controls: Secondary antibody only with DAPI

Green-488nm laser (493-634 nm emission) & Blue-405 nm laser (410-497nm emission)

Salivary Gland

Gut

Musculature

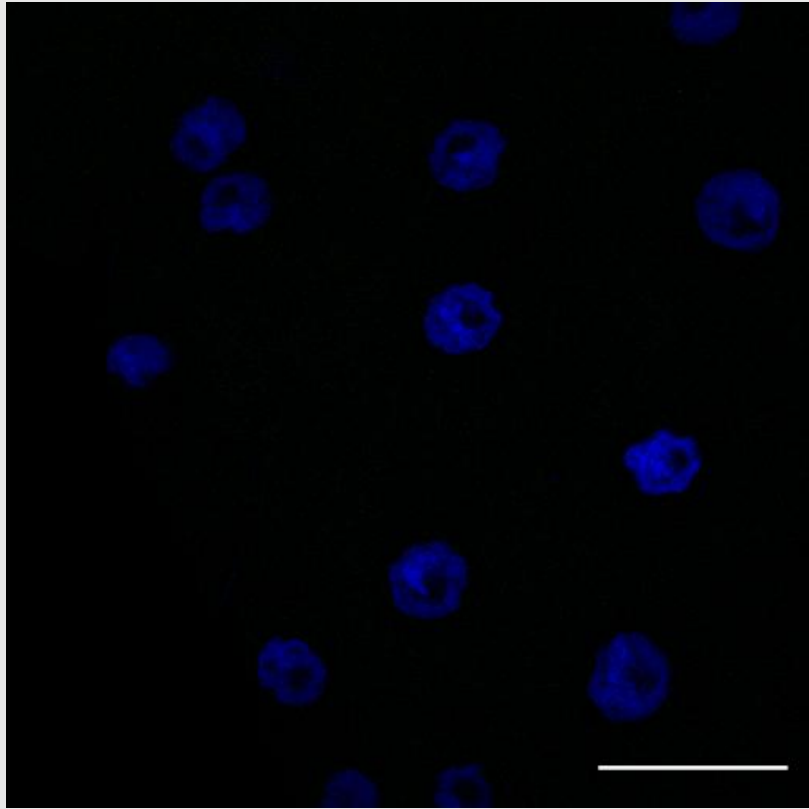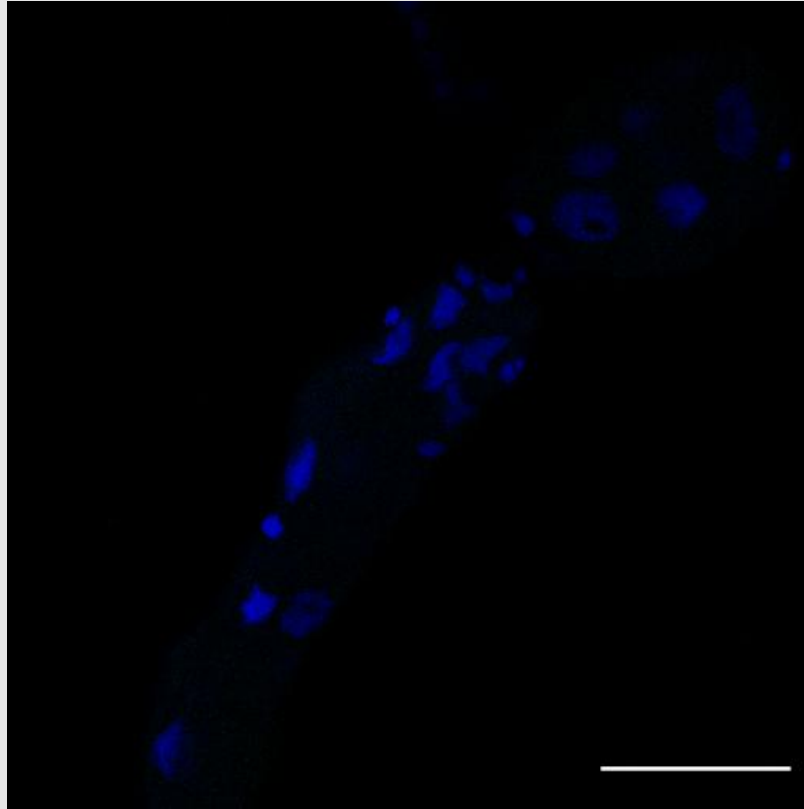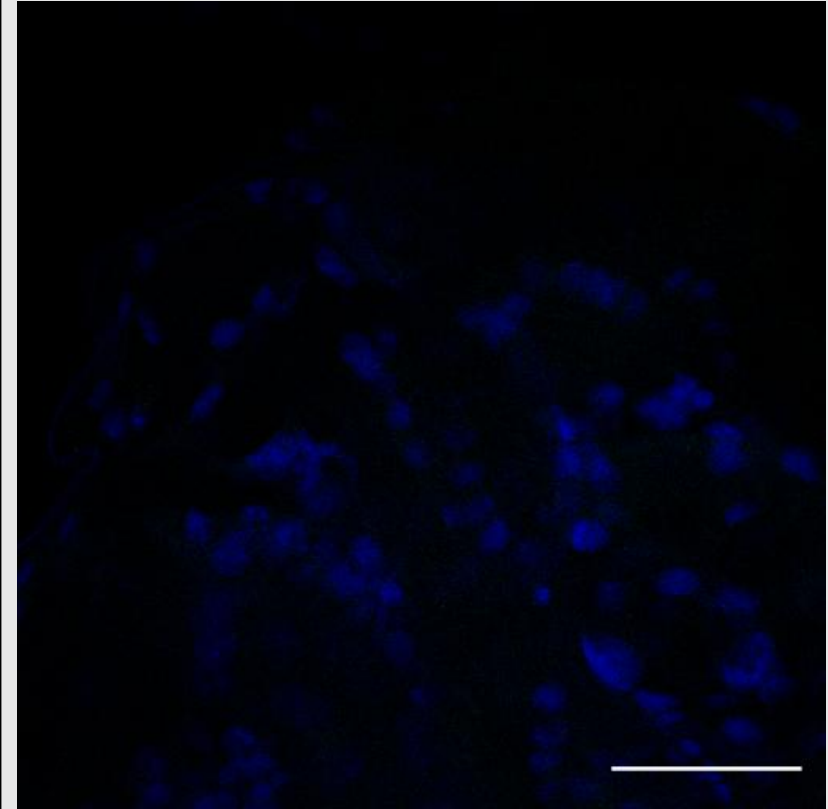

Supplement: s1 [file s1]
