# Supplementary material for: Abscisic Acid: A Potential Secreted Effector Synthesized by Phytophagous Insects for Host-Plant Manipulation
Source: Insects. 2023 May 24;14(6):489. doi: 10.3390/insects14060489 (PMC10299484; doi:10.3390/insects14060489)
Supplement: Supplementary file 1 [file insects-14-00489-s001.zip]

Archive with 4 entries (4 files):
- ABA_Supplemental Figure S1 - Grayscale Treatment Images.pdf
- ABA_Supplemental Figure S2 - Controls.pdf
- Supplemental File-Immunohistochemical Whole Mounted Tissue Protocol for Antibodies for Abscisic Acid.pdf
- Supplemental Table S1.pdf
