# Supplementary figures and images for: Abscisic Acid: A Potential Secreted Effector Synthesized by Phytophagous Insects for Host-Plant Manipulation
Source: MDPI journal article supplement (doi:10.3390/insects14060489), 2023-05-24

DAPI

FITC

Combo (DAPI+FITC)

M  
u  
s  
c  
u  
l  
a  
t  
u  
r  
e

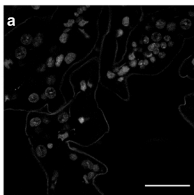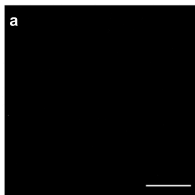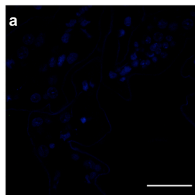

S  
a  
l  
i  
v  
a  
r  
y

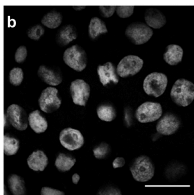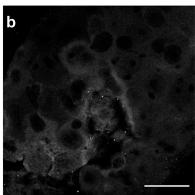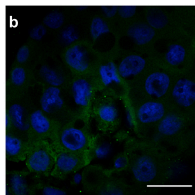

G  
u  
t

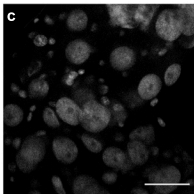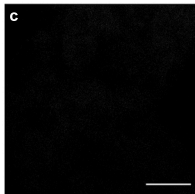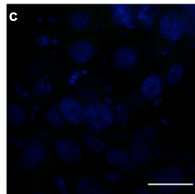

Supplement: s1 [file s1]
